# Supplementary material for: Three New Compounds from Aspergillus terreus PT06-2 Grown in a High Salt Medium
Source: Mar Drugs. 2011 Aug 12;9(8):1368–78. doi: 10.3390/md9081368 (PMC3164379; doi:10.3390/md9081368)

## Supporting Information

### Three New Compounds from *Aspergillus terreus* PT06-2 Grown in a High Salt Medium

Yi Wang, Jinkai Zheng, Peipei Liu, Wei Wang and Weiming Zhu \*

Key Laboratory of Marine Drugs, Chinese Ministry of Education, School of Medicine and Pharmacy, Ocean University of China, Qingdao 266003, China

|                                                                                             |    |
|---------------------------------------------------------------------------------------------|----|
| <b>Figure S1.</b> The $^1\text{H}$ -NMR spectrum of compound <b>1</b> in $\text{CDCl}_3$    | S2 |
| <b>Figure S2.</b> The $^{13}\text{C}$ -NMR spectrum of compound <b>1</b> in $\text{CDCl}_3$ | S3 |
| <b>Figure S3.</b> The $^1\text{H}$ -NMR spectrum of compound <b>2</b> in $\text{CDCl}_3$    | S4 |
| <b>Figure S4.</b> The $^{13}\text{C}$ -NMR spectrum of compound <b>2</b> in $\text{CDCl}_3$ | S5 |
| <b>Figure S5.</b> The $^1\text{H}$ -NMR spectrum of compound <b>3</b> in acetone- $d_6$     | S6 |
| <b>Figure S6.</b> The $^{13}\text{C}$ -NMR spectrum of compound <b>3</b> in acetone- $d_6$  | S7 |

**Figure S1.** The  $^1\text{H}$ -NMR spectrum of compound **1** in  $\text{CDCl}_3$ .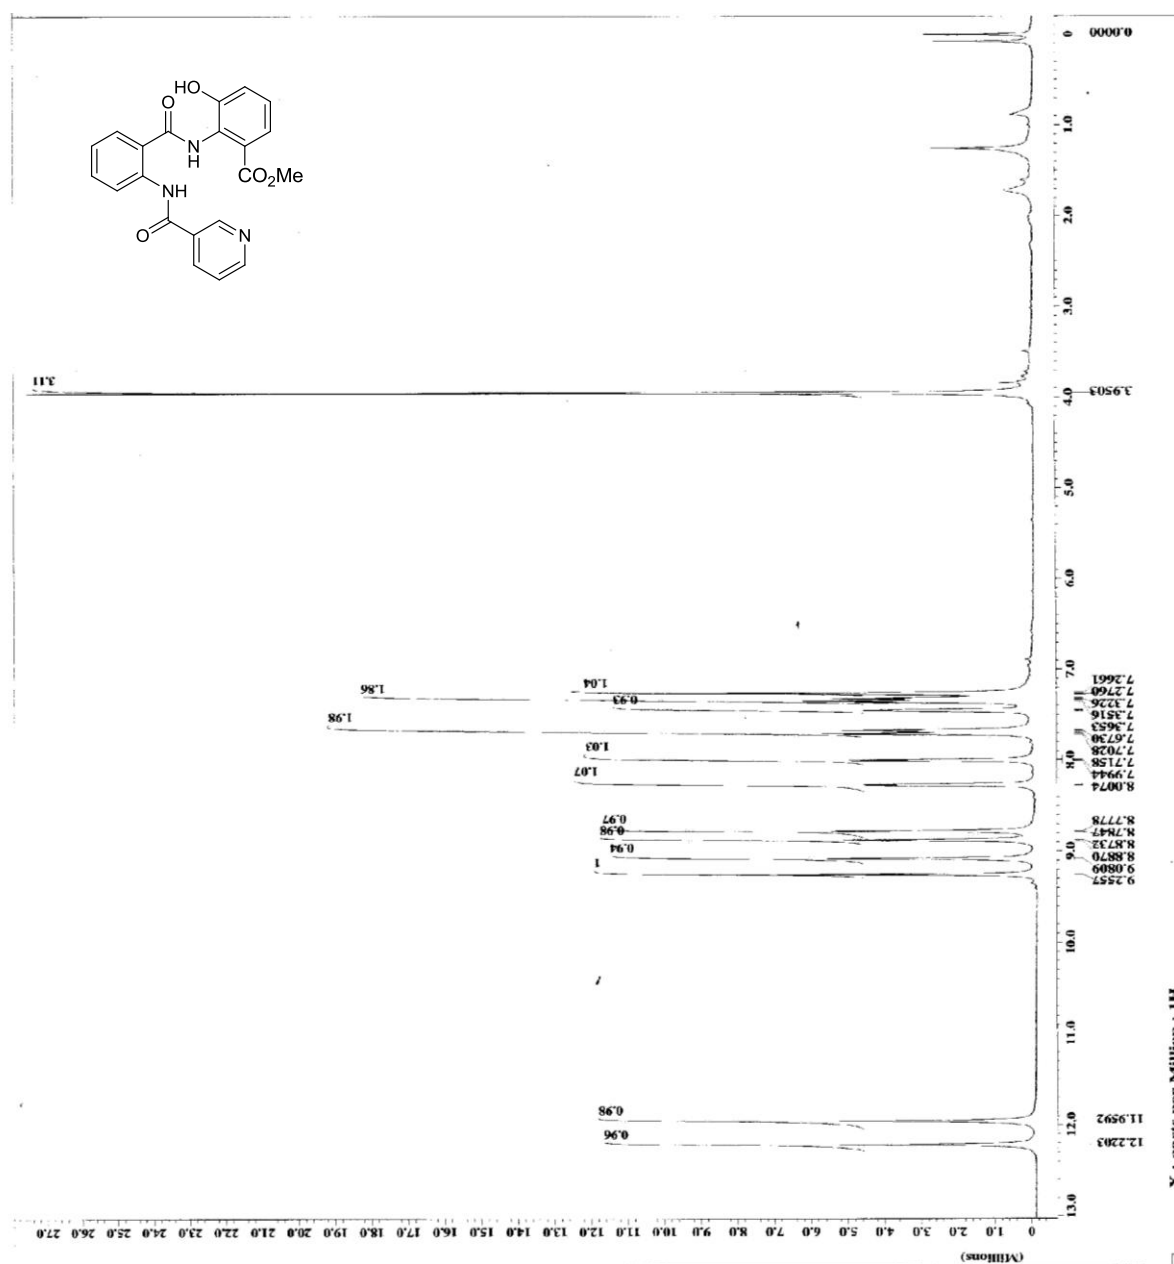

**Figure S2.** The  $^{13}\text{C}$ -NMR spectrum of compound **1** in  $\text{CDCl}_3$ .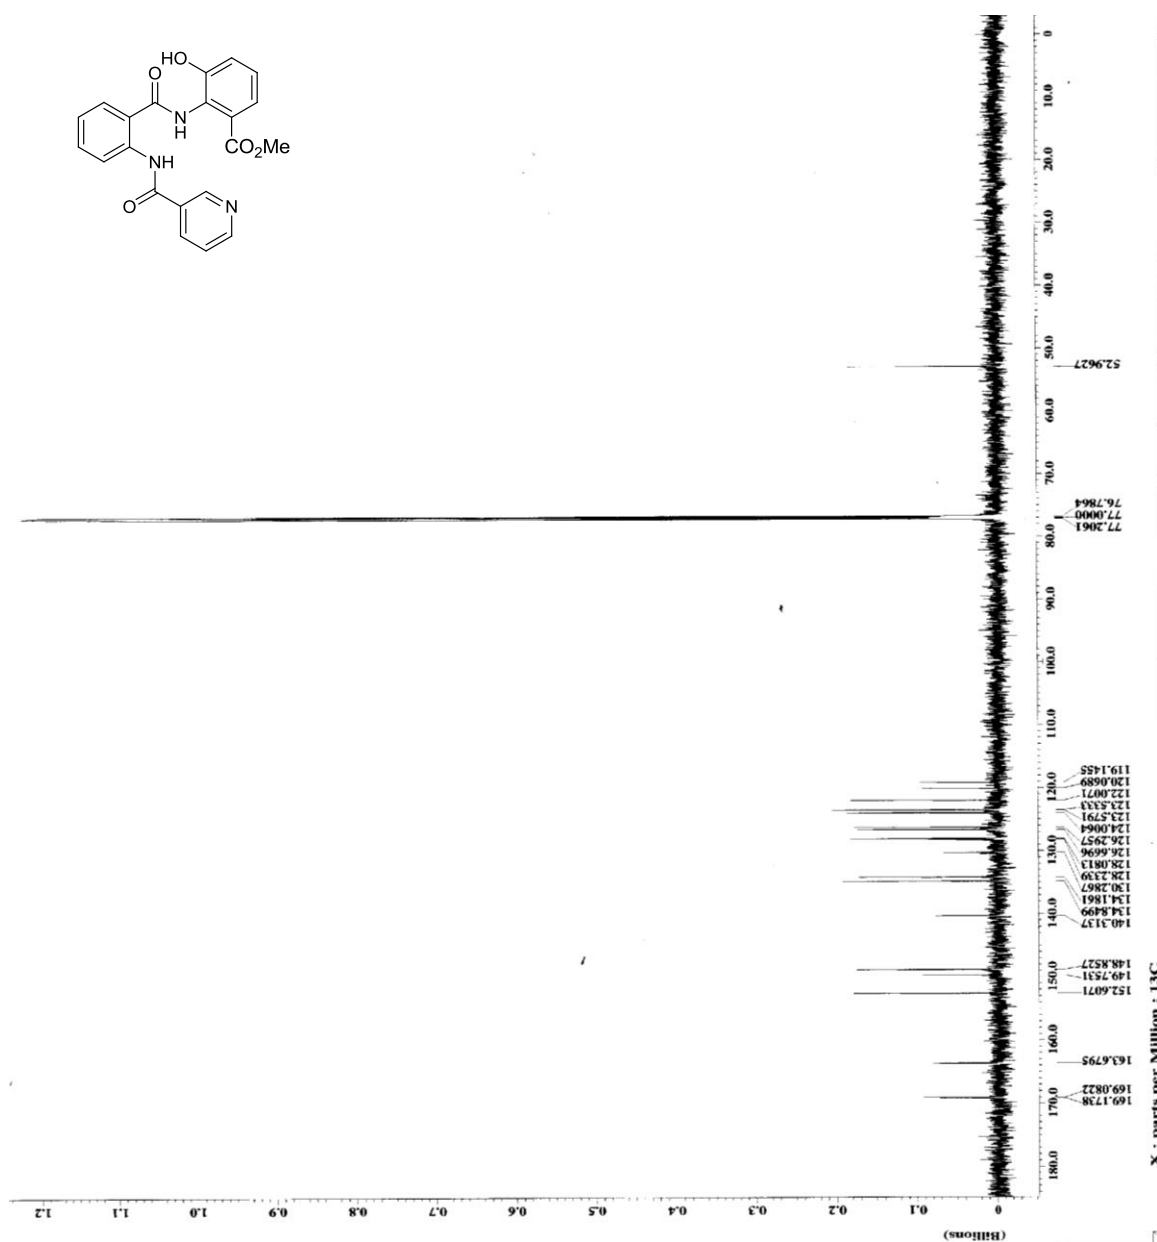

**Figure S3.** The  $^1\text{H}$ -NMR spectrum of compound **2** in  $\text{CDCl}_3$ .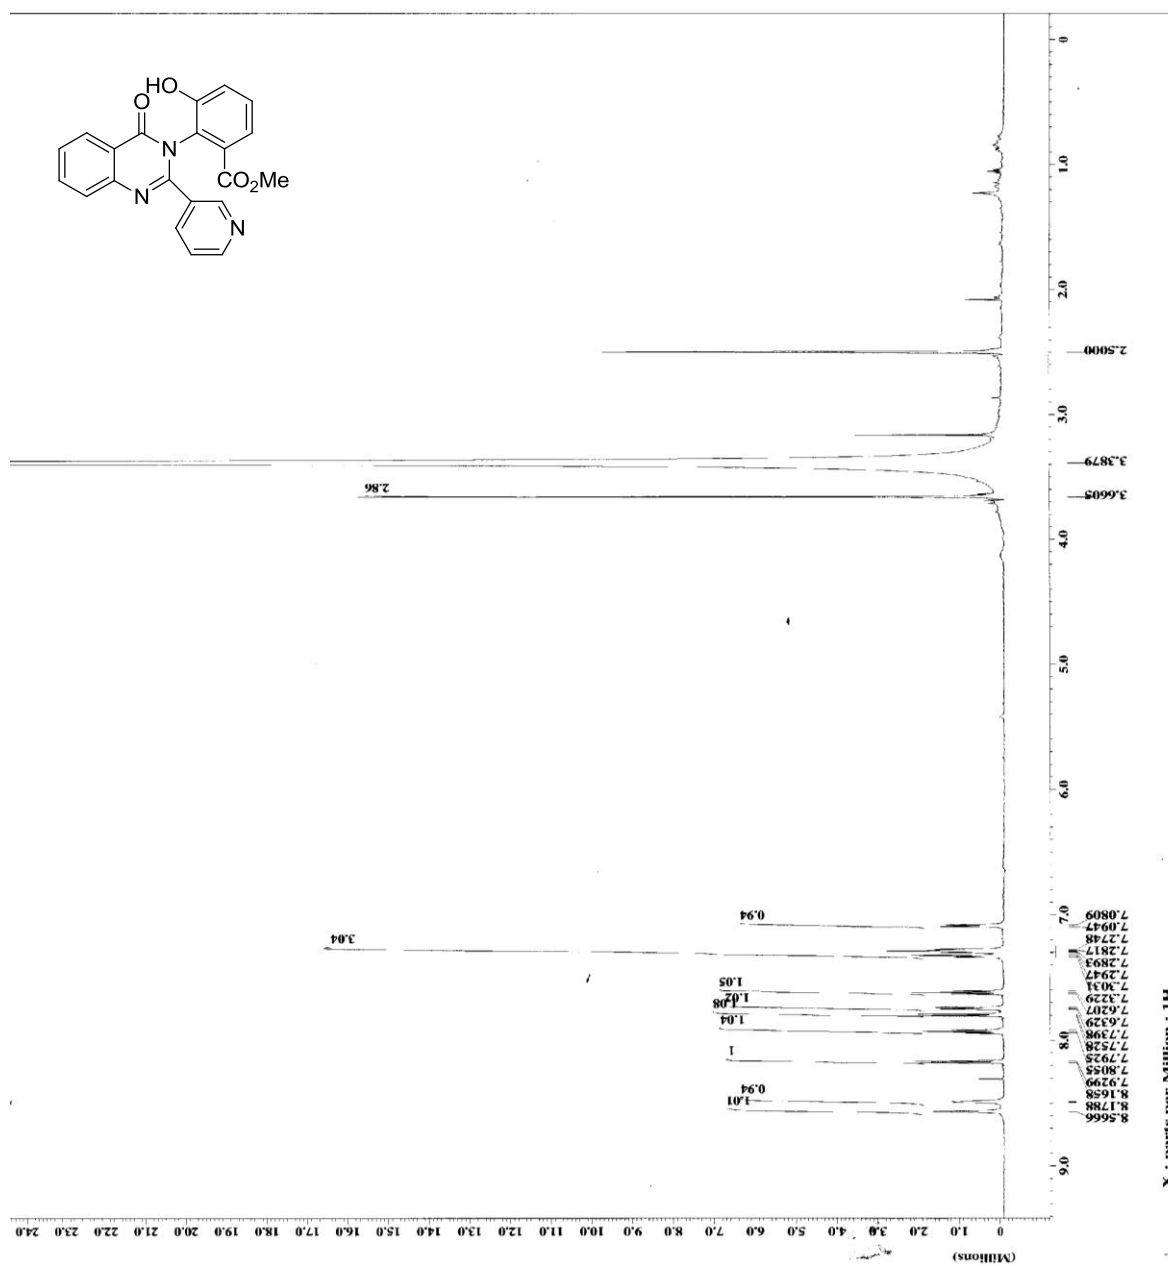

**Figure S4.** The  $^{13}\text{C}$ -NMR spectrum of compound **2** in  $\text{CDCl}_3$ .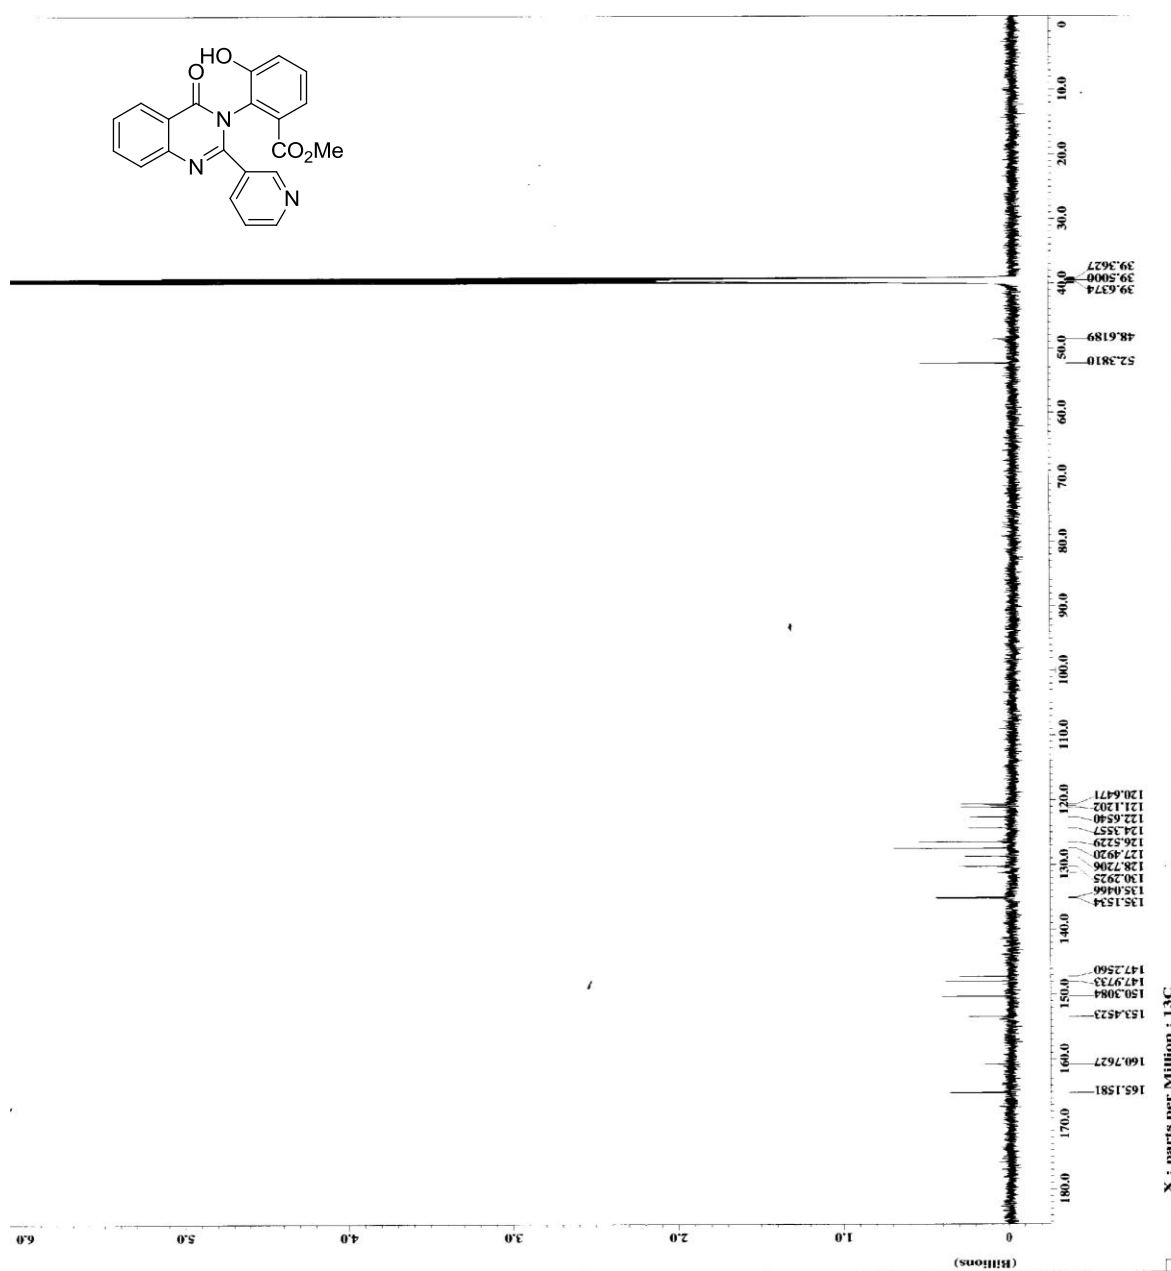

**Figure S5.** The  $^1\text{H}$ -NMR spectrum of compound **3** in acetone- $d_6$ .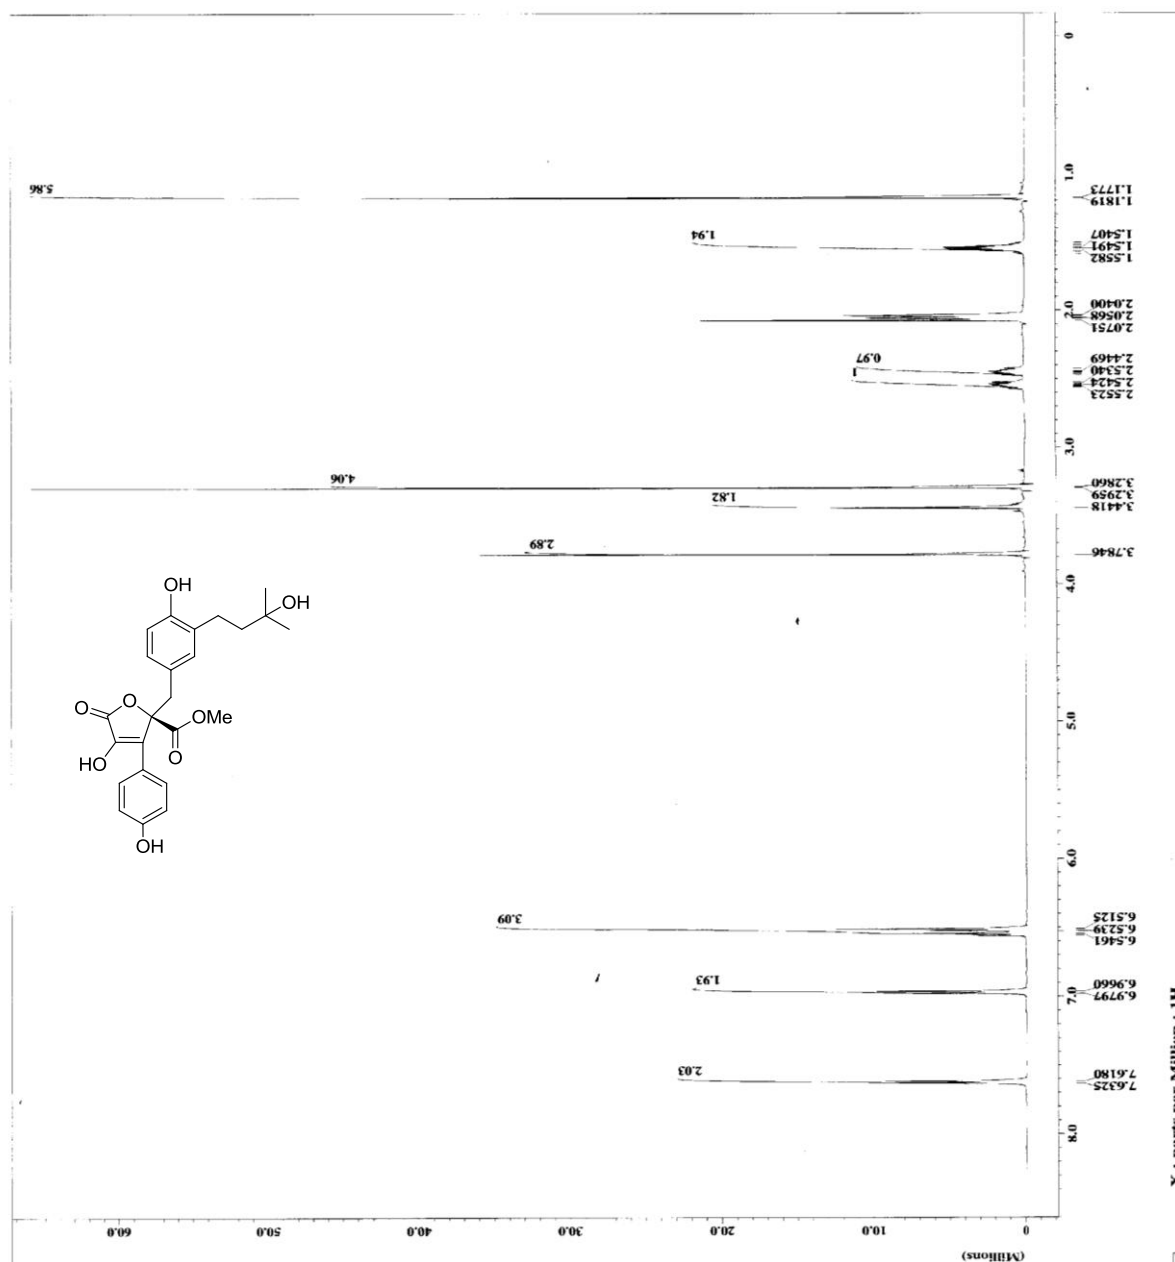

**Figure S6.** The  $^{13}\text{C}$ -NMR spectrum of compound **3** in acetone- $d_6$ .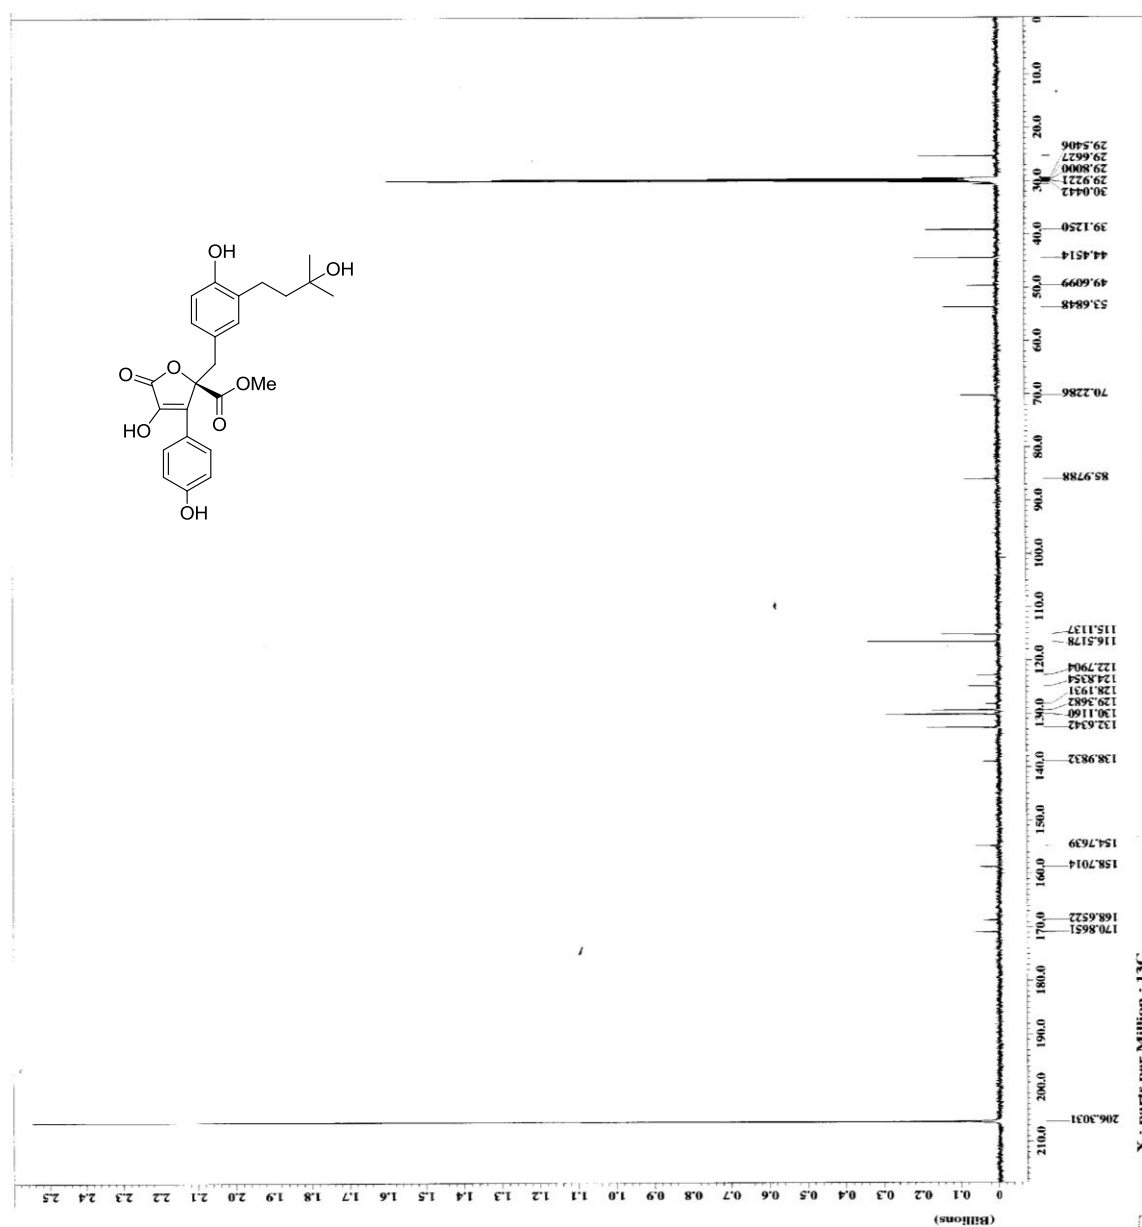

Supplement: Supplementary file 1 [file marinedrugs-09-01368-s001.pdf]
